# Supplementary material for: The Mechanism for Type I Interferon Induction by Mycobacterium tuberculosis is Bacterial Strain-Dependent
Source: PubMed Central journal article supplement (PMC4976988; doi:10.1371/journal.ppat.1005809), 2016-08-08
Supplement: ppat.1005809.s001.pdf [file ppat.1005809.s001.pdf]

| <b>Mtb strain</b>       | <b>Lineage number</b> | <b>Lineage name</b> | <b>Family</b> | <b>Characteristics</b>                                                                                                                                                                     |
|-------------------------|-----------------------|---------------------|---------------|--------------------------------------------------------------------------------------------------------------------------------------------------------------------------------------------|
| H37Rv                   | 4                     | Euro-America        | Euro-America  | Virulent strain derived from the parent strain H37 that was isolated from a 19-year old male with chronic pulmonary tuberculosis in New York <sup>1</sup> .                                |
| H37Rv<br>$\Delta$ Esx-1 |                       |                     |               | Negative control strain. Does not secrete ESAT-6 <sup>2</sup> , access the cytosol <sup>3</sup> , or induce IFN $\beta$ <sup>4</sup> .                                                     |
| 1182                    | 6                     | West Africa         | West Africa   | Strain with reduced virulence in humans <sup>5</sup> and in mice <sup>6</sup> compared to Lineage 4 and Lineage 2 strains. Isolated from a male with pulmonary tuberculosis in The Gambia. |
| 4334                    | 2                     | East Asia           | Beijing       | Strain with increased virulence in guinea pigs compared to other Lineage 2, Beijing family strains <sup>7</sup> . Isolated from a patient with pulmonary tuberculosis in San Francisco.    |

<sup>1</sup>Steenken & Gardner, *Am Rev Tuberc* (1946); <sup>2</sup>Unpublished data; <sup>3</sup>Houben *et al*, *Cell Microbiol* (2012); Simeone *et al*. *PLoS Pathog* (2012); <sup>4</sup>Simeone *et al*. *PLoS Pathog* (2015), <sup>5</sup>de Jong *et al*. *J Infect Dis* (2008), <sup>6</sup>Bold *et al*. *J Infect Dis* (2012), <sup>7</sup>Kato-Maeda *et al*. *Clin Vaccine Immunol* (2012).
