# Supplementary material for: The Mechanism for Type I Interferon Induction by Mycobacterium tuberculosis is Bacterial Strain-Dependent
Source: PubMed Central journal article supplement (PMC4976988; doi:10.1371/journal.ppat.1005809), 2016-08-08
Supplement: ppat.1005809.s002.pdf [file ppat.1005809.s002.pdf]

|               | <b>Effect</b> | <b>F</b> | <b>df</b> | <b>P</b> |
|---------------|---------------|----------|-----------|----------|
| <b>MOI 1</b>  | CFU           | 0.363    | 1         | 0.579    |
|               | TNF           | 0.084    | 1         | 0.787    |
|               | Strain        | 96.127   | 2         | <0.001   |
| <b>MOI 5</b>  | CFU           | 1.636    | 1         | 0.27     |
|               | TNF           | 0.507    | 1         | 0.516    |
|               | Strain        | 35.137   | 2         | 0.003    |
| <b>MOI 10</b> | CFU           | 0.385    | 1         | 0.569    |
|               | TNF           | 0.179    | 1         | 0.694    |
|               | Strain        | 9.254    | 2         | 0.032    |
